# Supplementary material for: Relative Availability of Nitrogen and Calcium Regulates the Growth of Poplar Seedlings Due to Transcriptome Changes
Source: MDPI journal article supplement (doi:10.3390/f14091899), 2023-09-18
Supplement: s1 [file s1]

Table S1. Reaction primers and conditions.

| Gene         | Primer Name   | Sequence(5'-3')          | Length of amplicon | Thermal profile             |
|--------------|---------------|--------------------------|--------------------|-----------------------------|
| 1            | 1-gene5159-F  | TATCTCATCCACATCAATCC     | 179                | 95°C for 3 min × 1 cycle;   |
|              | 1-gene5159-R  | ACAACTTTTCACCTCTTTCTG    |                    | 95°C for 30s, 60°C for 30s, |
| 2            | 2-gene32319-F | TCTCTCATAAATGGCCAAAC     | 183                | 72°C for 40s × 35 cycle;    |
|              | 2-gene32319-R | GAAGATTTTGAAGGTTCCAG     |                    | 95°C for 3 min × 1 cycle;   |
| EF1 $\alpha$ | F             | ATTGACAGGCGGTCTGGTAAGGAA | Unknown            | 95°C for 30s, 60°C for 30s, |
|              | R             | AAACGACCAAGTGGAGGATACGCT |                    | 72°C for 40s × 35 cycle;    |

Table S2. Statistical table of sequencing data of "Liaohu No.1" Poplar seedlings.

| Sample | Raw reads | Raw bases  | Clean reads | Clean bases | Error rate(%) | Q20(%) | Q30(%) | GC content(%) |
|--------|-----------|------------|-------------|-------------|---------------|--------|--------|---------------|
| L1     | 59036760  | 8914550760 | 58429284    | 8726096162  | 0.0237        | 98.56  | 95.42  | 44.54         |
| L2     | 53999582  | 8153936882 | 53655110    | 8013094093  | 0.0232        | 98.78  | 96     | 44.47         |
| L3     | 62357448  | 9415974648 | 61847128    | 9219362589  | 0.0232        | 98.78  | 96.04  | 44.63         |
| O1     | 54081734  | 8166341834 | 53709898    | 8017999731  | 0.0231        | 98.8   | 96.07  | 44.56         |
| O2     | 53709182  | 8110086482 | 53341884    | 7976579194  | 0.0235        | 98.65  | 95.63  | 44.08         |
| O3     | 56037722  | 8461696022 | 55631348    | 8316868333  | 0.0232        | 98.75  | 95.96  | 44.58         |
| H1     | 57243706  | 8643799606 | 56752418    | 8480356448  | 0.0233        | 98.71  | 95.82  | 44.95         |
| H2     | 53093868  | 8017174068 | 52776236    | 7897178758  | 0.023         | 98.85  | 96.19  | 44.73         |
| H3     | 64054078  | 9672165778 | 63511838    | 9468851386  | 0.0232        | 98.75  | 95.96  | 44.46         |

(a) Sample: sample description; (b) Raw reads: the total number of entries in the original sequencing data (reads represent sequencing read segments, and one reads is one); (c) Raw bases: the total data of original sequencing (the number of raw reads multiplied by reads length); (d) Clean reads: the total number of items of sequencing data after quality control; (e) Clean bases: the total sequencing data after quality control (number of clean reads multiplied by reads length); (f) Error rate (%): the average error rate of sequencing bases corresponding to quality control data is generally less than 0.1%; (g) Q20(%), Q30(%): Q20 and Q30 respectively refer to the percentage of bases with sequencing quality above 99% and 99.9% in total bases, generally Q20 in more than 85%, Q30 in more than 80%; (h) GC content (%): the percentage of the total G and C bases corresponding to the quality control data in the total bases

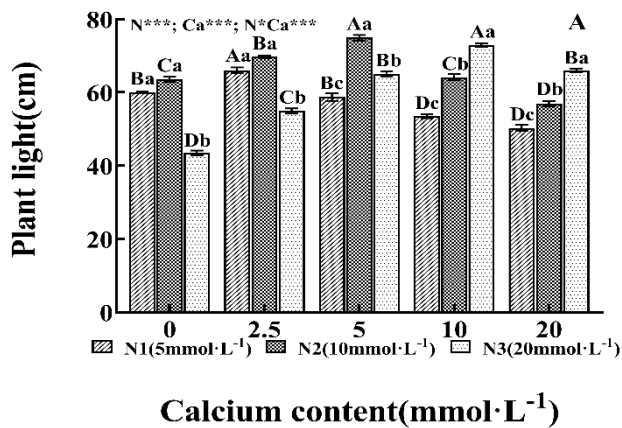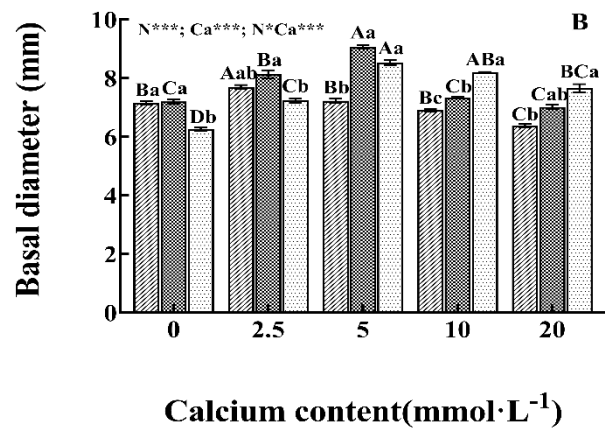

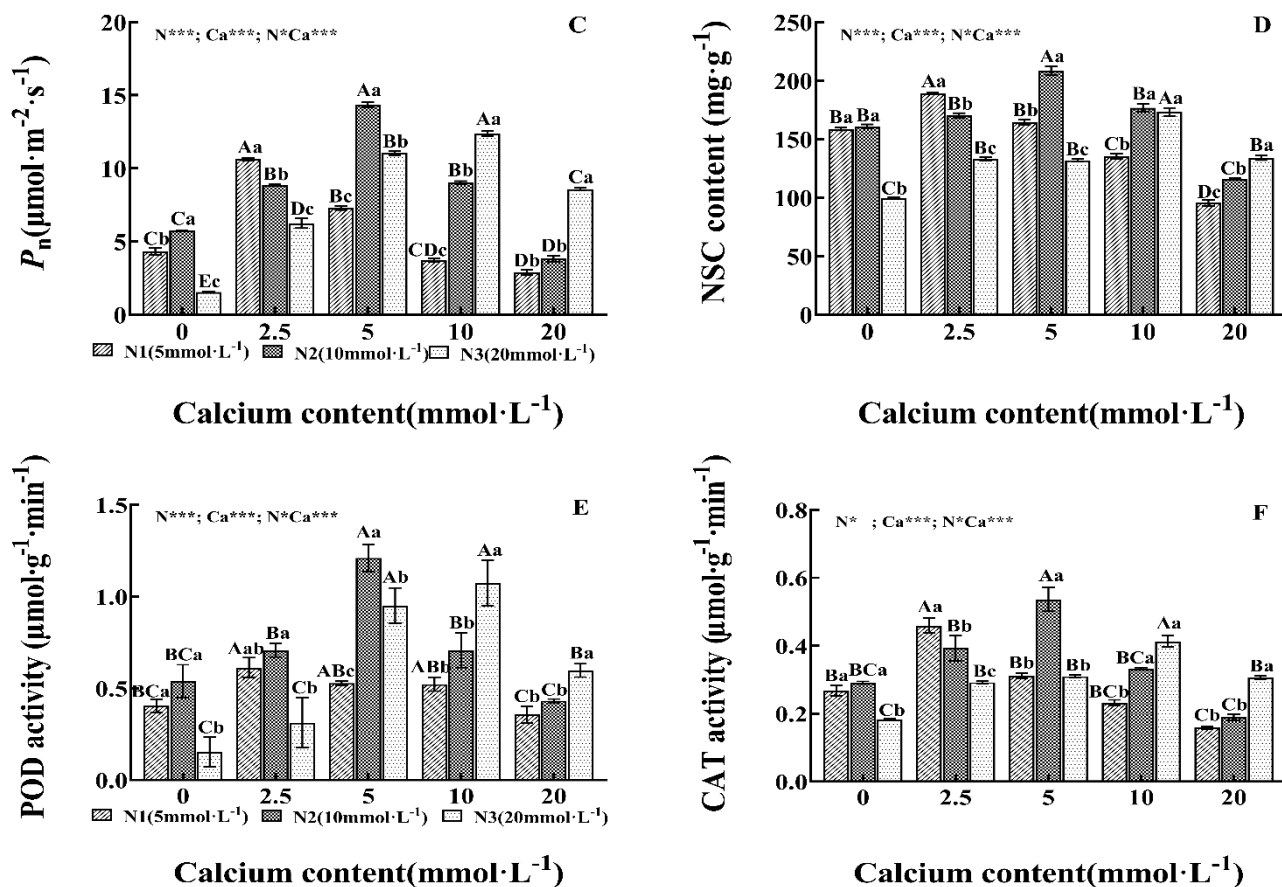

Figure S1. Effects of combined application of nitrogen and calcium on growth and physiological characteristics of poplar seedlings

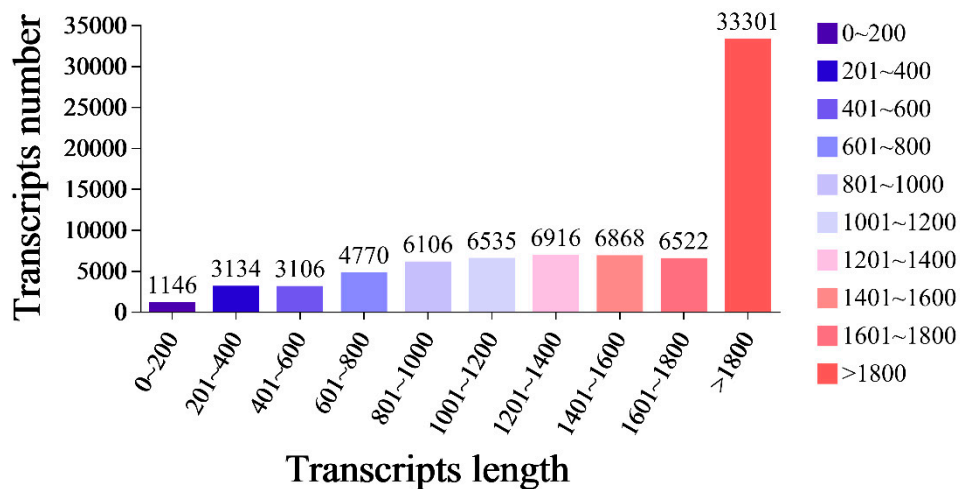

Figure S2. Transcript length distribution bar graph.

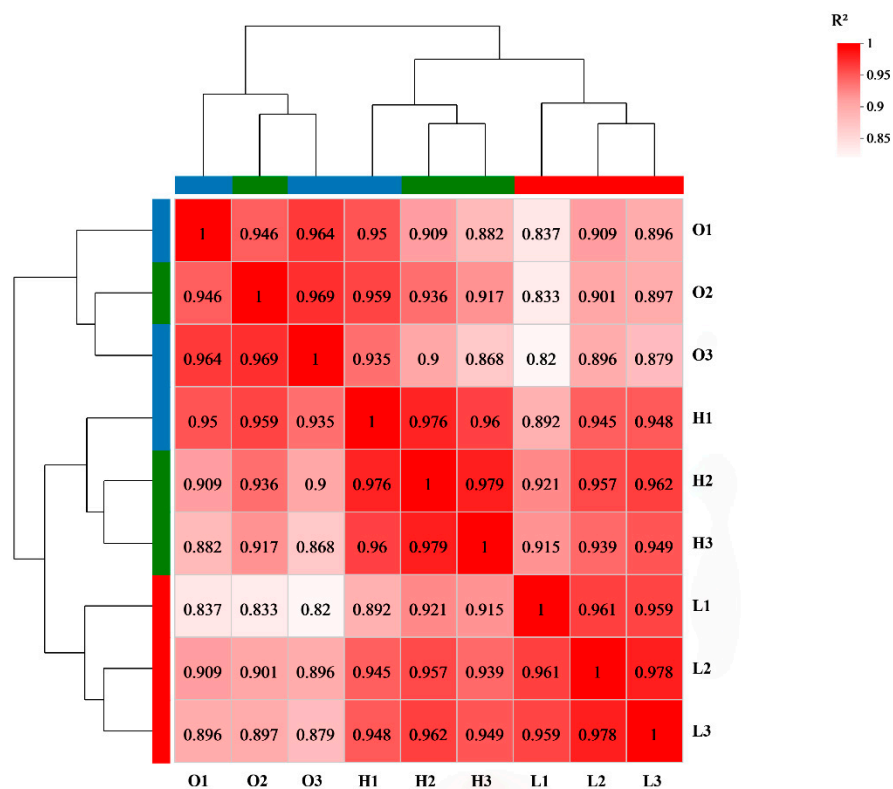

Figure S3. Pearson correlations between all samples

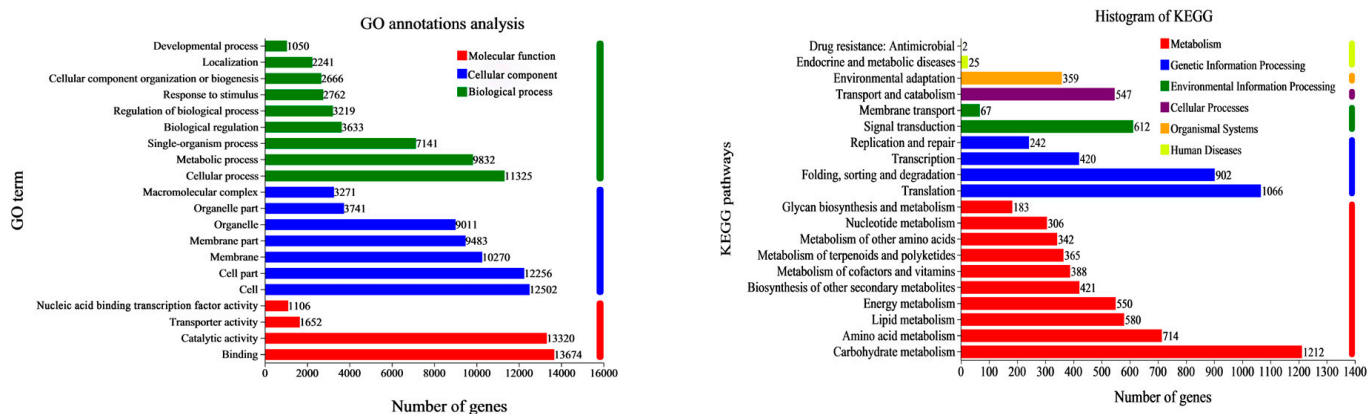

Figure S4. GO and KEGG annotation classification statistics
